# Supplementary material for: Ultra-fast single-file transport of a simple liquid beyond the collective behavior zone
Source: Royal Society of Chemistry journal article supplement (doi:10.1039/c5cp07253k), 2016-01-01
Supplement: c5cp07253k1.pdf [file c5cp07253k1.pdf]

## Ultra-fast single-file transport of a simple liquid beyond the collective behavior zone

Jiaye Su<sup>1\*</sup>, Keda Yang<sup>2</sup>, Decai Huang<sup>1</sup>

<sup>1</sup>Department of Applied Physics, Nanjing University of Science and Technology, Nanjing, Jiangsu 210094, China.

<sup>2</sup>Department of Supercomputing Center, Computer Network Information Center, Chinese Academy of Sciences, Beijing 100190, China

\*Author to whom correspondence should be addressed. Electronic mail:

[jysu@iccas.ac.cn](mailto:jysu@iccas.ac.cn) or [jysu@njust.edu.cn](mailto:jysu@njust.edu.cn)

### Supporting Information

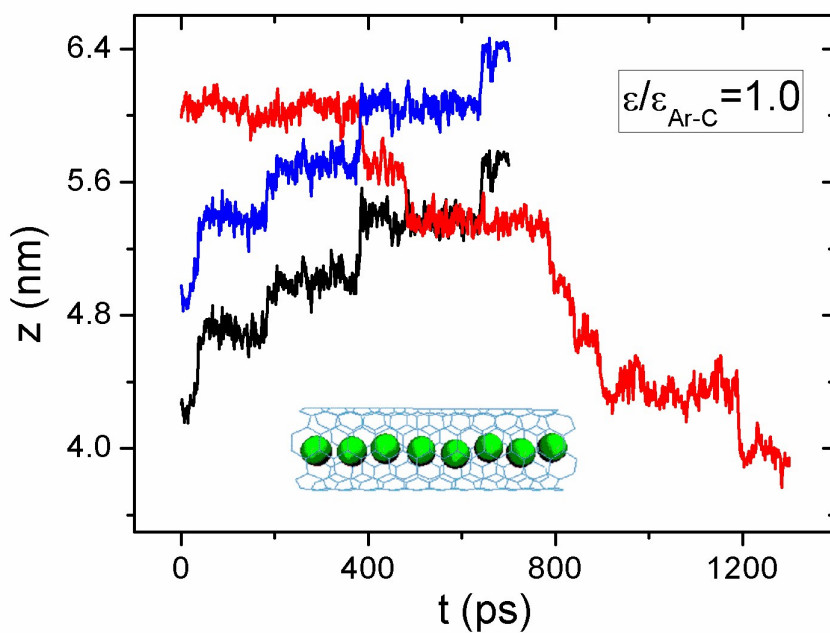

(a)

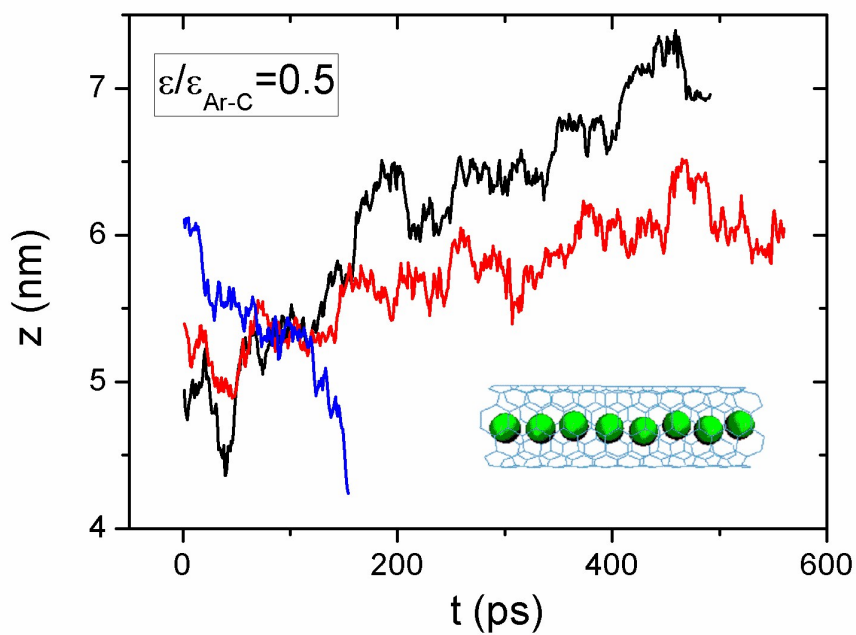

(b)

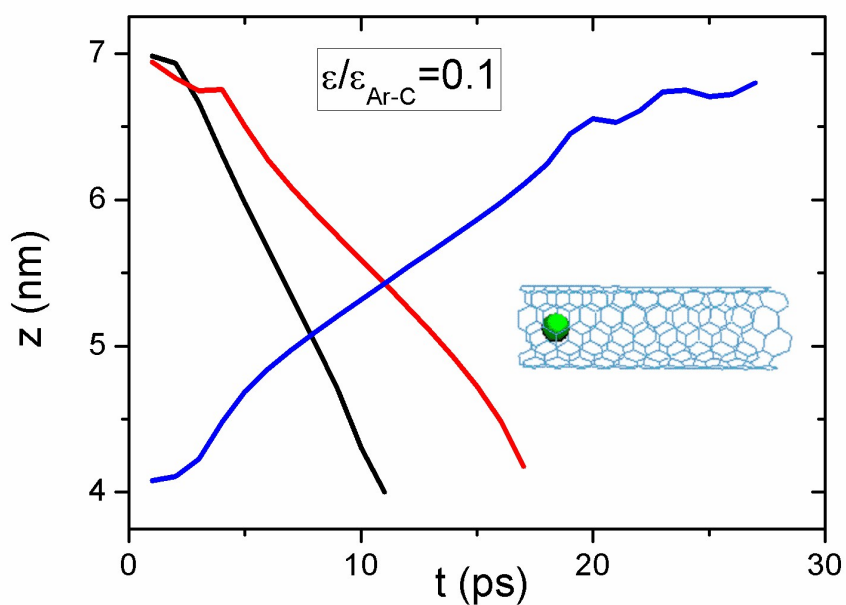

(c)

Figure S1. The particle motions inside the channel for different liquid-channel interactions. (a) Under strong liquid-channel interaction, the particles move collectively and step-by-step; (b) under moderate liquid-channel interaction, the particles also move collectively but with obscure steps; (c) under weak liquid-channel interaction, the particle move alone with nearly constant velocity.
